# Supplementary material for: Mass spectrometry reflects key aspects of copper-amyloid β chemistry
Source: Royal Society of Chemistry journal article supplement (doi:10.1039/d4an00693c), 2024-01-01
Supplement: d4an00693c1.pdf [file d4an00693c1.pdf]

## Supporting Information for: Mass spectrometry reflects key aspects of copper-amyloid $\beta$ chemistry

Sarah Brandner, Tanja Habeck, Frederik Lermyte\*

*Department of Chemistry, Clemens-Schöpf-Institute of Chemistry and Biochemistry, Technical University of Darmstadt, Peter-Grünberg-Strasse 4, 64287 Darmstadt, Germany*

Correspondence: frederik.lermyte@tu-darmstadt.de

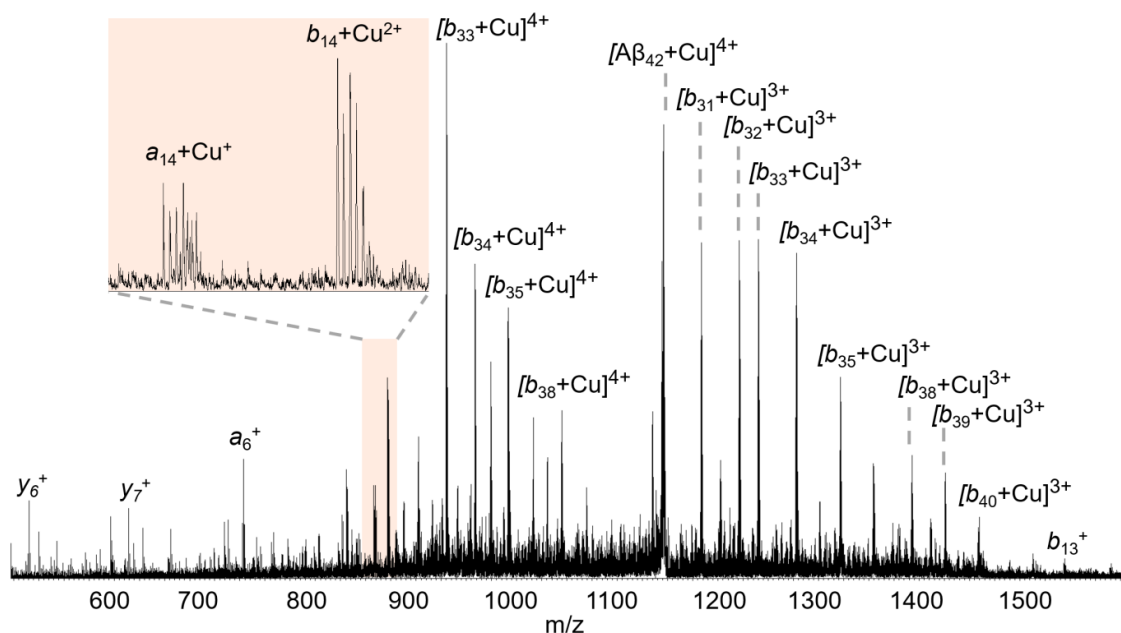

**Figure S1.** CID spectrum of  $[A\beta_{42}+2H+Cu(II)]^{4+}$  at a collision potential of 32 V (normalised collision energy *ca.* 0.03 eV/Da), showing similar results as in (Everett et al. 2021).

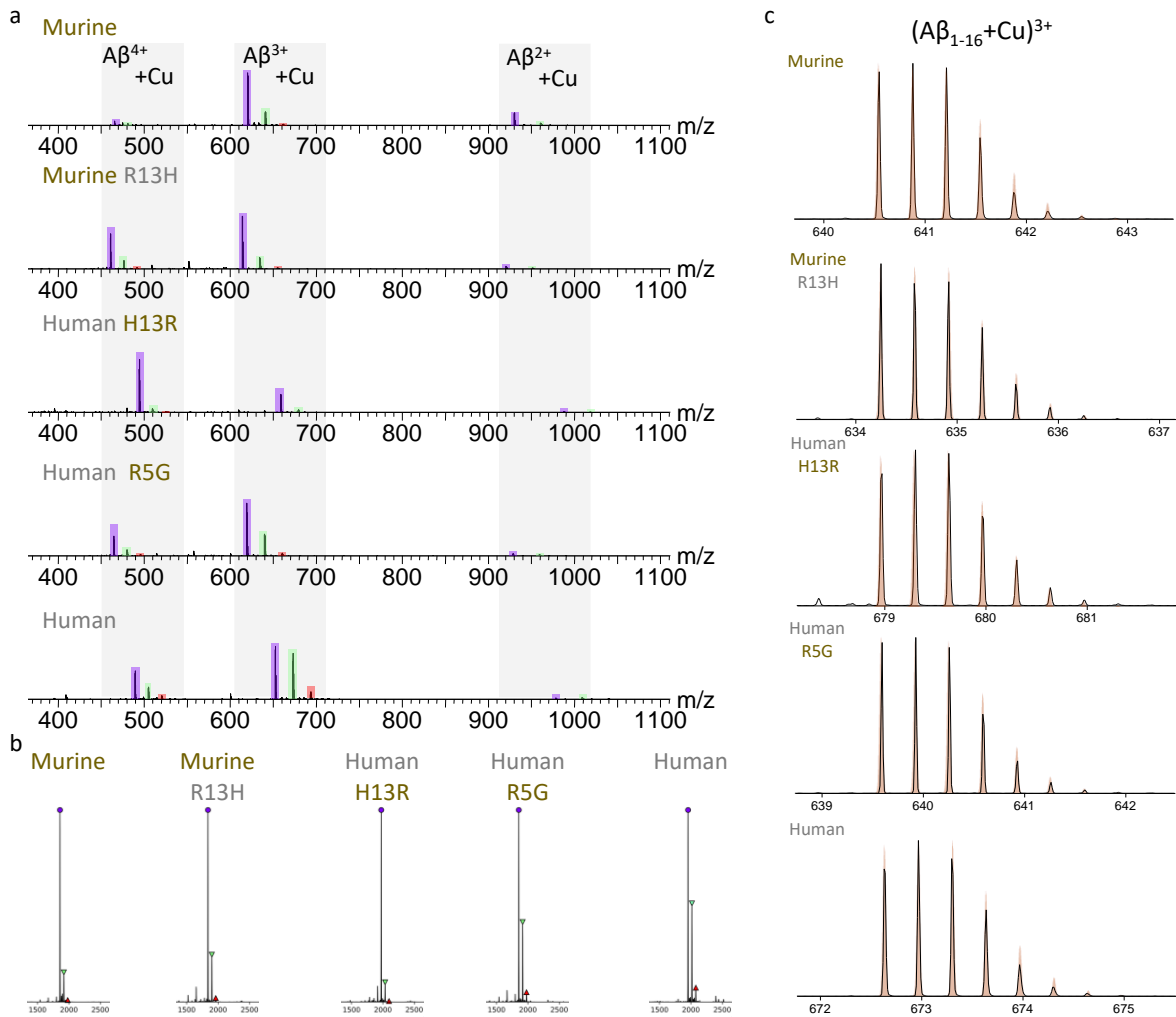

**Figure S2. (a)** Full MS spectra of  $10 \mu\text{M } A\beta_{1-16}$  construct and  $5 \mu\text{M } \text{CuSO}_4$ . The metal-free (violet), Cu-bound (green), and double Cu-bound (red)  $A\beta_{1-16}$  are present as doubly, triply and quadruply charged ions. **(b)** Charge-deconvolution of the spectra in Panel (a). Deconvolution was carried out with UniDec (Marty et al. 2015; Reid et al. 2019), and peptides with zero, one, and two bound copper ions are indicated with a blue circle, green triangle, and red triangle, respectively. **(c)** Isotopic distribution of Cu-bound  $A\beta_{1-16}$  at charge state 3+. Simulated distributions assuming 100%  $\text{Cu(II)}$  are overlaid in orange.

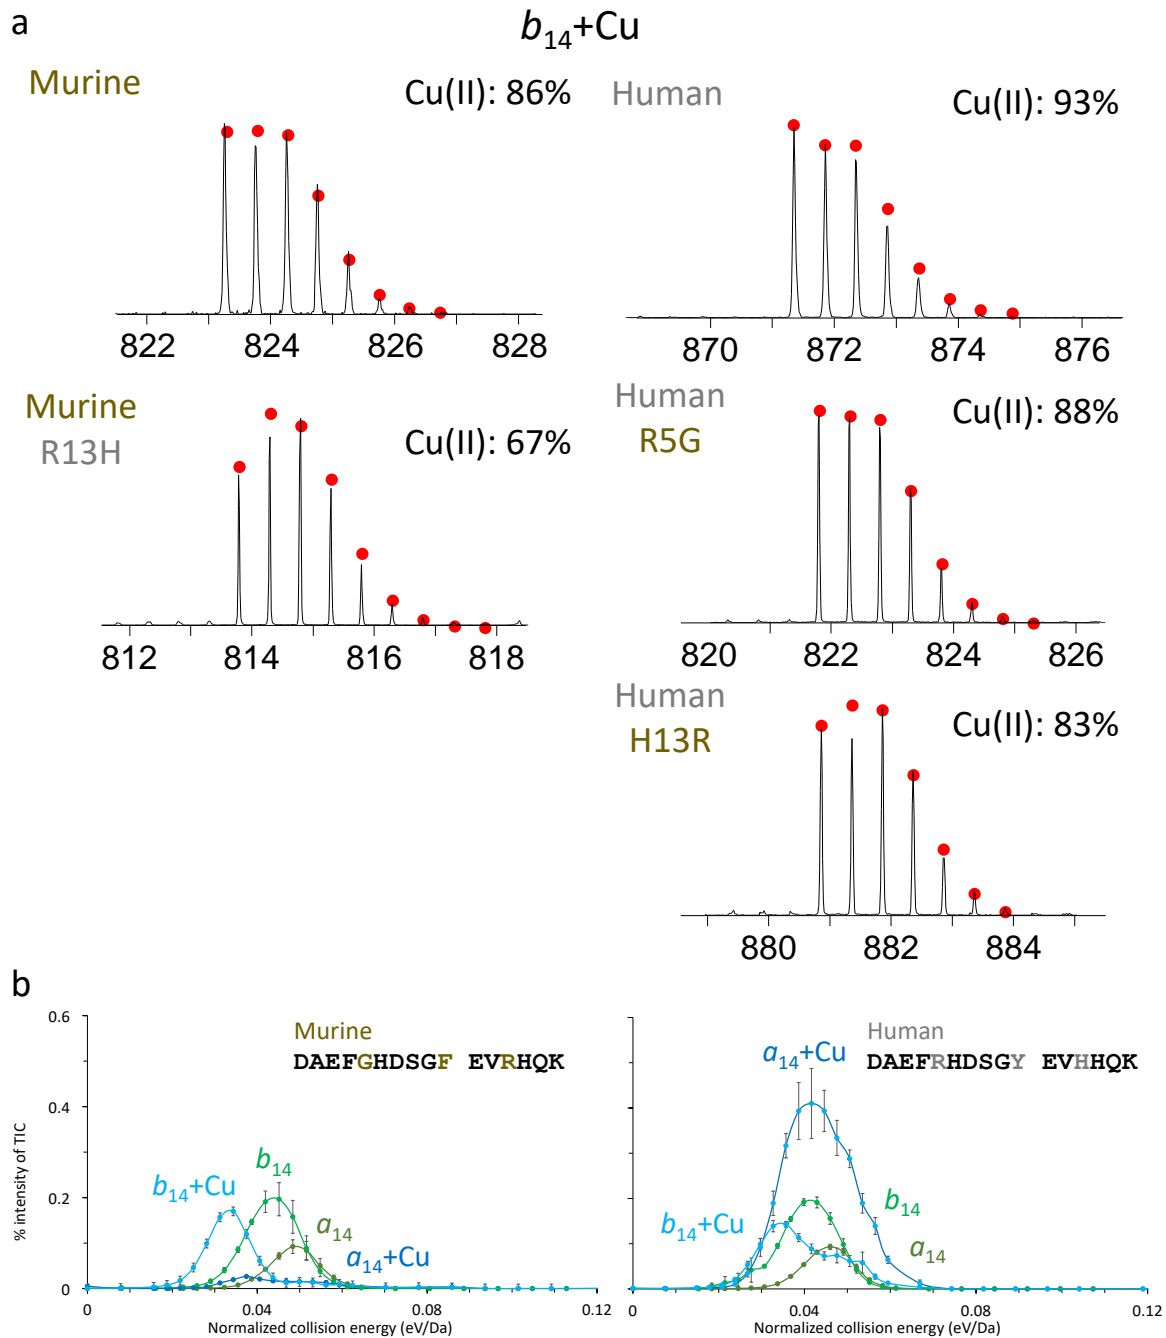

**Figure S3. (a)** Isotope distribution of the  $b_{14}$  fragment at a collision voltage of 22 V (equivalent to a normalised collision energy of ca. 0.035 eV/Da) and the calculated percentage of Cu(II) (red dots show the best-fit simulation of the Cu(I)/Cu(II) ratio). **(b)** Energy-dependence of the relative intensity of  $a_{14}$  and  $b_{14}$  fragments after collisional activation of metal-free murine and human  $A\beta_{1-16}$  (dark and light green curves for  $a_{14}$  and  $b_{14}$ , respectively) and of Cu(II)-complexes of murine and human  $A\beta_{1-16}$  (dark and light blue curves for  $a_{14}$  and  $b_{14}$ , respectively). Note that no copper-free  $a_{14}$  or  $b_{14}$  fragments were detected in the spectra of the metal-free precursor. Error bars show the standard deviation of triplicate experiments, illustrating excellent reproducibility and consistency.

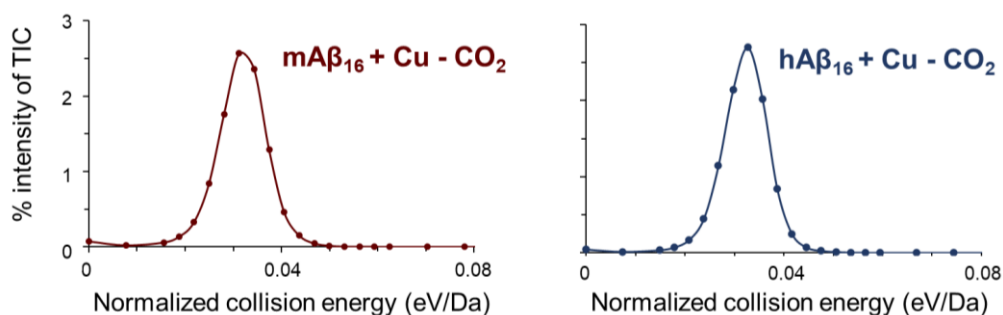

**Figure S4.** Energy-dependence of the relative intensity of the decarboxylated precursor after collisional activation of Cu(II)-bound murine and human A $\beta_{1-16}$ .

### Experimental Section

Full-length A $\beta_{1-42}$  was purchased from Bachem AG (Bubendorf, Switzerland). LC-MS grade water was obtained from Fisher Scientific (Schwerte, Germany), and other reagents, including custom peptides, from Merck (Darmstadt, Germany). MS measurements were performed with a Synapt XS instrument. Samples were loaded into glass emitters produced in-house with a Sutter P-97 Flaming/Brown micropipette puller and transferred into the gas phase with nano-electrospray ionisation in direct-infusion positive-ion mode. For full-length amyloid  $\beta$  and its copper complex, the 4+ charge state was isolated in the quadrupole of the instrument; for the smaller custom peptides, we selected the 3+ precursor. Collisional activation was performed in the Trap cell. In fragmentation experiments, we acquired data for 3 minutes per spectrum and averaged the fragment intensities over this time. We subsequently normalised this average intensity to the total ion current to allow comparison between experiments.

### References

- Everett, James; Lermyte, Frederik; Brooks, Jake; Tjendana-Tjhin, Vindy; Plascencia-Villa, Germán; Hands-Portman, Ian et al., Biogenic metallic elements in the human brain?, *Science advances*, 2021, **7**, eabf6707.
- Marty, Michael T.; Baldwin, Andrew J.; Marklund, Erik G.; Hochberg, Georg K. A.; Benesch, Justin L. P.; Robinson, Carol V., Bayesian deconvolution of mass and ion mobility spectra: from binary interactions to polydisperse ensembles, *Analytical chemistry*, 2015, **87**, 4370–4376.
- Reid, Deseree J.; Diesing, Jessica M.; Miller, Matthew A.; Perry, Scott M.; Wales, Jessica A.; Montfort, William R.; Marty, Michael T., MetaUniDec: High-Throughput Deconvolution of Native Mass Spectra, *Journal of the American Society for Mass Spectrometry*, 2019, **30**, 118–127.
